# Supplementary material for: Light-driven visualization of endogenous cysteine, homocysteine, and glutathione using a near-infrared fluorescent probe
Source: Royal Society of Chemistry journal article supplement (doi:10.1039/c9tb01645g), 2019-01-01
Supplement: c9tb01645g1.pdf [file c9tb01645g1.pdf]

## ***Supporting Information***

### **Light-Driven Visualization of Endogenous Cysteine, Homocysteine, and Glutathione Near-Infrared Fluorescent Probe**

Yang Yang, Yingzhe Wang, Yan Feng, Chen Cao, Xuerui Song, Guolin  
Zhang and Weisheng Liu\*

Key Laboratory of Nonferrous Metal Chemistry and Resources Utilization  
of Gansu Province and State Key Laboratory of Applied Organic  
Chemistry, College of Chemistry and Chemical Engineering, Lanzhou  
University, Lanzhou, 730000, China.

\*Corresponding author. Tel: +86/931/8915151

Fax number: +86/931/8912582

E/mail: liuws@lzu.edu.cn

## Experimental section

**Experimental Details.** Unless otherwise noted, all of the chemicals for syntheses were obtained from ordinary supplier. Mass spectra (ESI) were performed on a Bruker Daltonics Esquire6000 spectrometer with a LQC system. High resolution mass spectra (HRMS) were carried out on a Bruker microTOF-Q II mass spectrometer. NMR spectra were measured on a JEOL-ECS-400 M instrument using tetramethylsilane (TMS) as an internal standard. Fluorescence spectra were carried out on a Hitachi F-7000 spectrofluorimeter. UV-Vis spectra were determined on a Varian Cary UV-Cary 100 spectrophotometer. Blue channel:  $E_x = 405$  nm,  $E_m = 475-515$  nm; green channel:  $E_x = 515$  nm,  $E_m = 540-600$  nm; red channel:  $E_x = 515$  nm,  $E_m = 700-780$  nm. B/G: merge of blue and green channels; B/R: merge of blue and red channels; G/R: merge of green and red channels; B/G/R: merge of blue, green, and red channels; B/B/G/R: merge of bright field, blue, green, and red channels.

**Cytotoxicity Tests.** The MTT assays were carried out to evaluate the cytotoxicity of probe **1**. HeLa cells were placed at  $1 \times 10^4$  cells per well in 96-well plates and then incubated for one day in a humidified CO<sub>2</sub> incubator (5% CO<sub>2</sub>). Subsequently, the cells were added with a series concentrations of probe **1** (0, 2.5, 5, 10, 20, 30, 50  $\mu$ M) and cultured for another day. Then 20  $\mu$ L of MTT dye solution (5 mg/mL) was added in each well. After 4 h, 150  $\mu$ L of dimethyl sulfoxide was added to dissolve the MTT formazan. Finally, an enzyme-linked immunosorbent assay (ELISA) reader (Bio-Rad, Model 550) was used to measure the OD570 (absorbance value) of each well referenced at 450 nm.

**The detection limit calculation.** The detection limit for thiophenols based on the IUPAC definition (signal-to-noise ratio  $S/N=3$ ) is calculated by the linear function and the following equation:

$$\text{Detection limit} = \frac{3\sigma}{k} \times 10^{-5} \text{ mol}\cdot\text{L}^{-1}$$

Where  $\sigma$  is the standard derivation of absorbance experiments of 13 blank solutions;  $k$  is the slope of the linear calibration curve in Figure S1-S3; the concentration of probe **1** is  $1 \times 10^{-5} \text{ mol}\cdot\text{L}^{-1}$ .

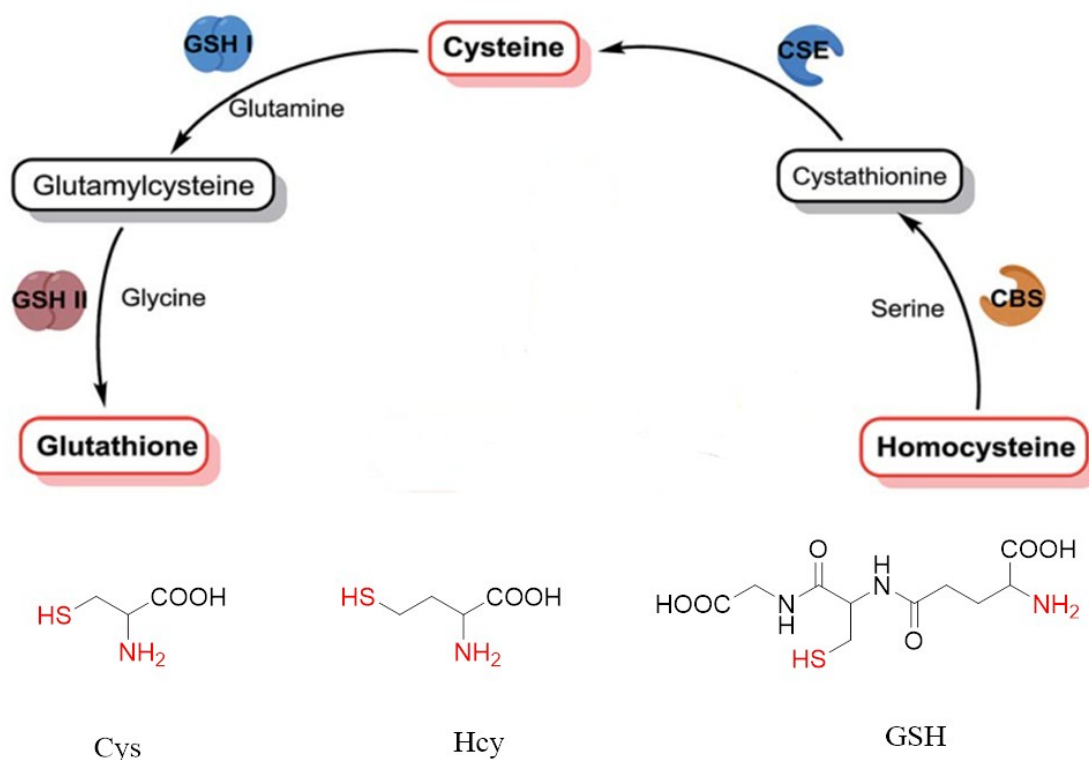

**Scheme S1** The Metabolic Relationship of Biothiols and its Structure.

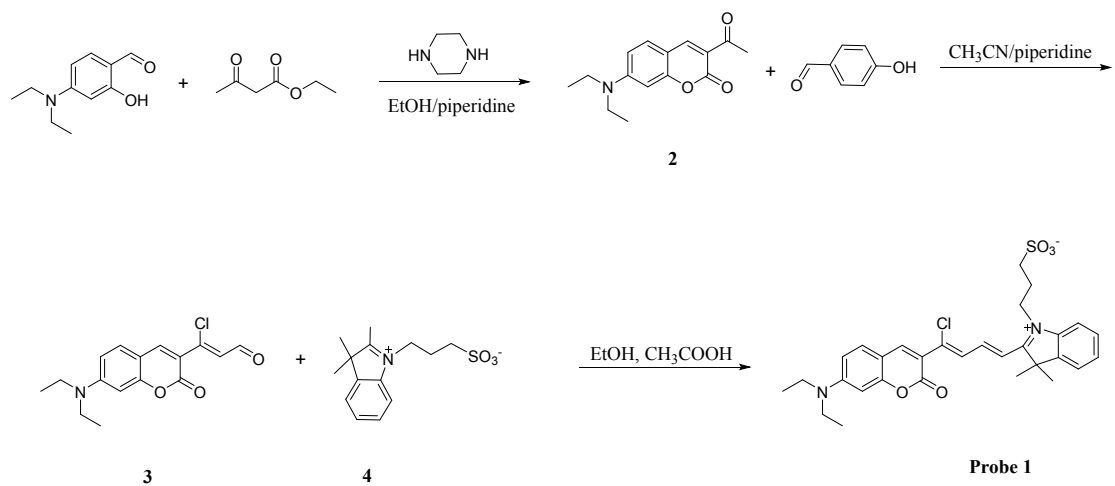

**Scheme S2** Synthetic route of probe **1**.

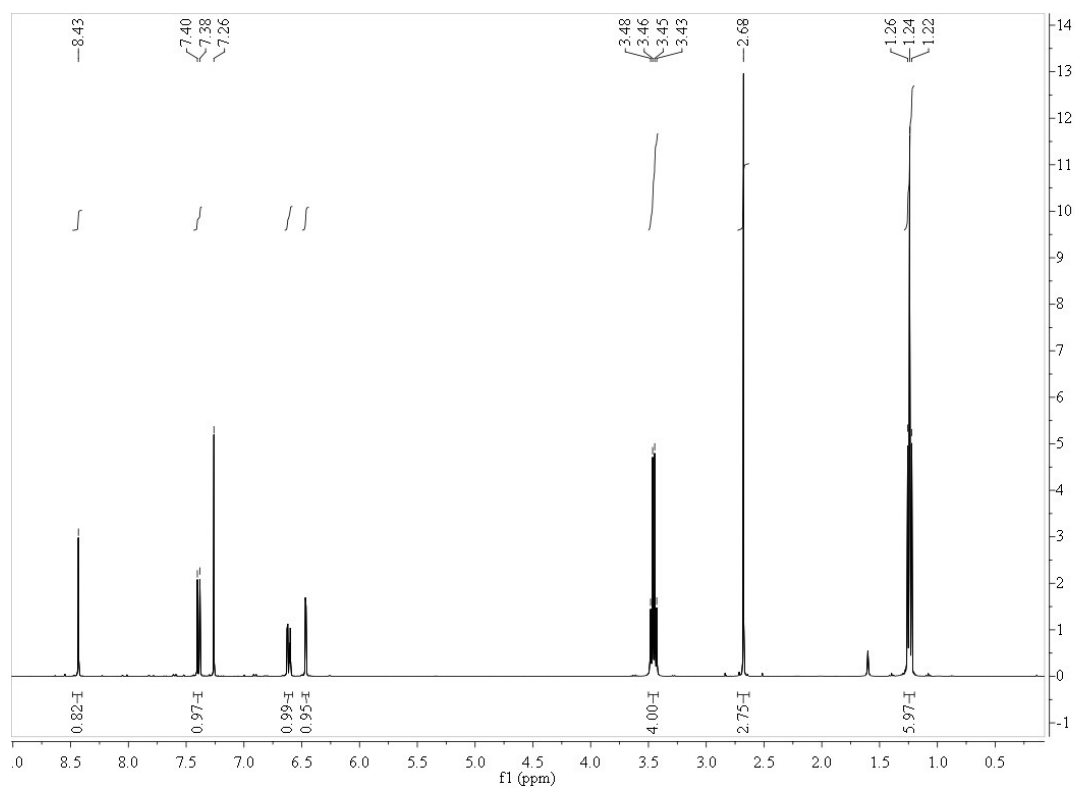

**Fig. S1**  $^1\text{H}$  NMR spectra of compound **2** in  $\text{CDCl}_3$ .

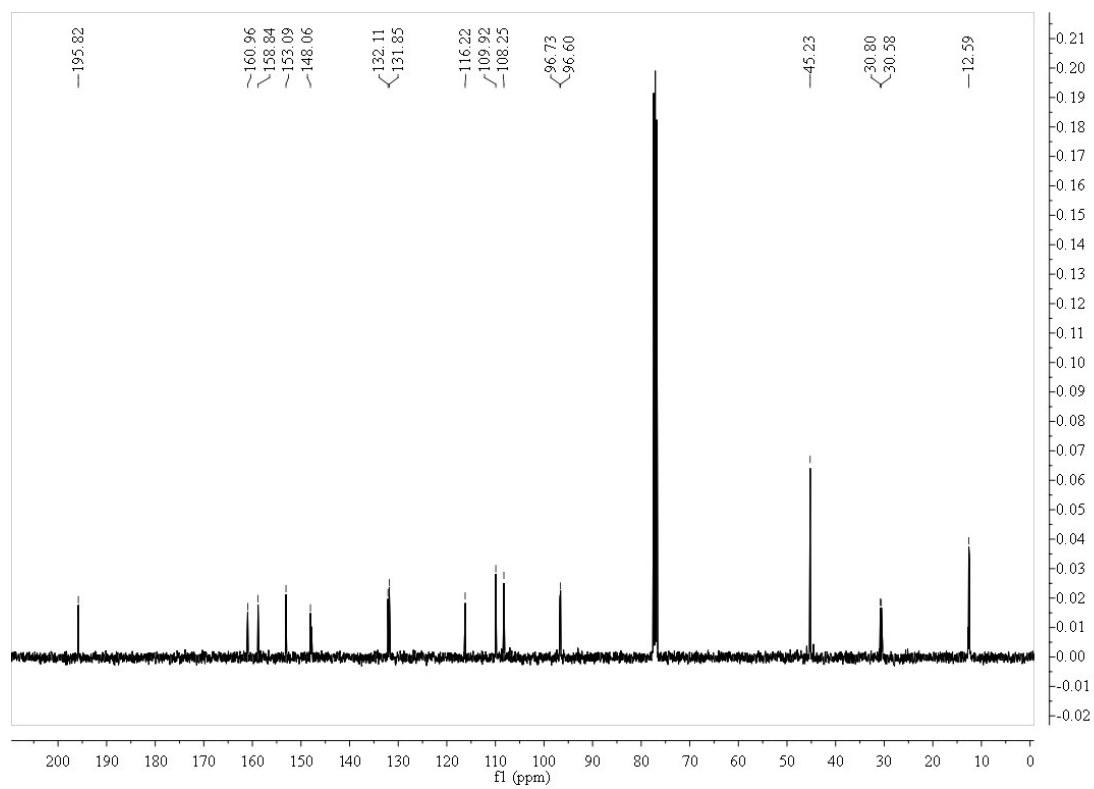

**Fig. S2**  $^{13}\text{C}$  NMR spectra of compound **2** in  $\text{CDCl}_3$ .

# Generic Display Report

## Analysis Info

Analysis Name D:\Data\Students\_MS\New Folder\yangyang20170405.d  
Method STUDENTS.m  
Sample Name default  
Comment

Acquisition Date 4/5/2017 10:53:40

Operator ESQ6K  
Instrument esquire6000

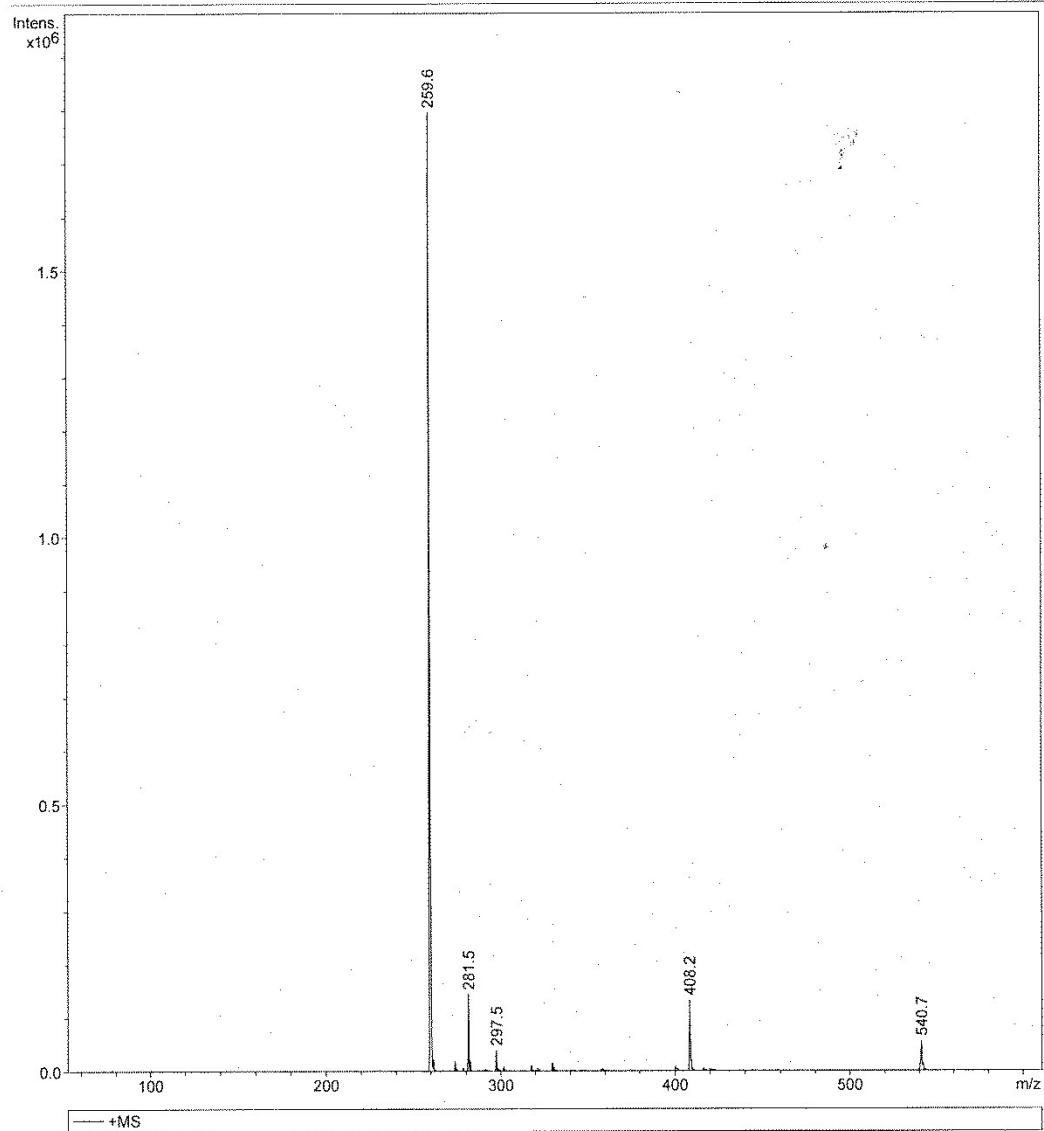

**Fig. S3** ESI-MS spectra of compound **2**.

# Generic Display Report

Analysis Info  
Analysis Name D:\Data\Students\_MS\New Folder\190417-FY-1.d  
Method STUDENTS\_20190227.m  
Sample Name default  
Comment

Acquisition Date 4/17/2019 11:10:36  
Operator ESQ6K  
Instrument esquire6000

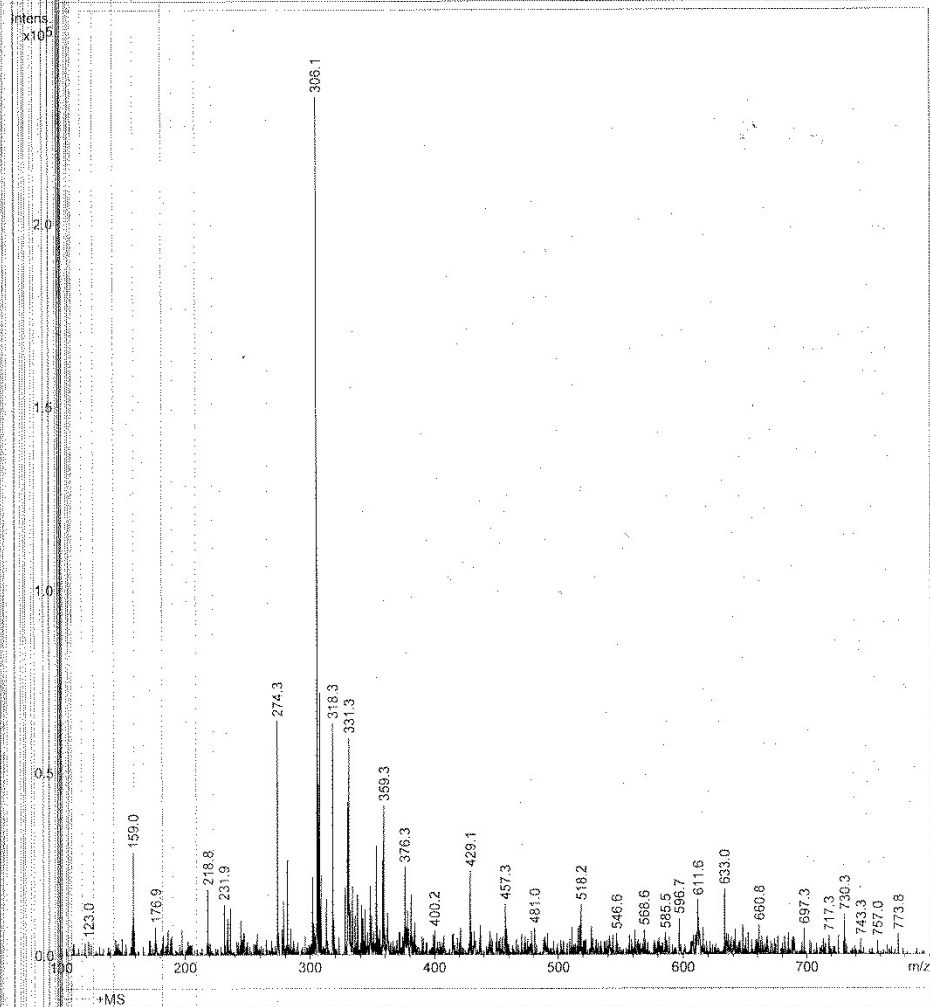

Bruker Daltonics DataAnalysis 3.4

printed: 4/17/2019 11:11:03

Page 1 of 1

Fig. S4 ESI-MS spectra of compound 3.

# Generic Display Report

Analysis Info  
Analysis Name D:\Data\Students\_MS\New Folder\20190327-WK.d  
Method STUDENTS\_20190227.m  
Sample Name default  
Comment

Acquisition Date 3/27/2019 11:22:12  
Operator ESQ6K  
Instrument esquire6000

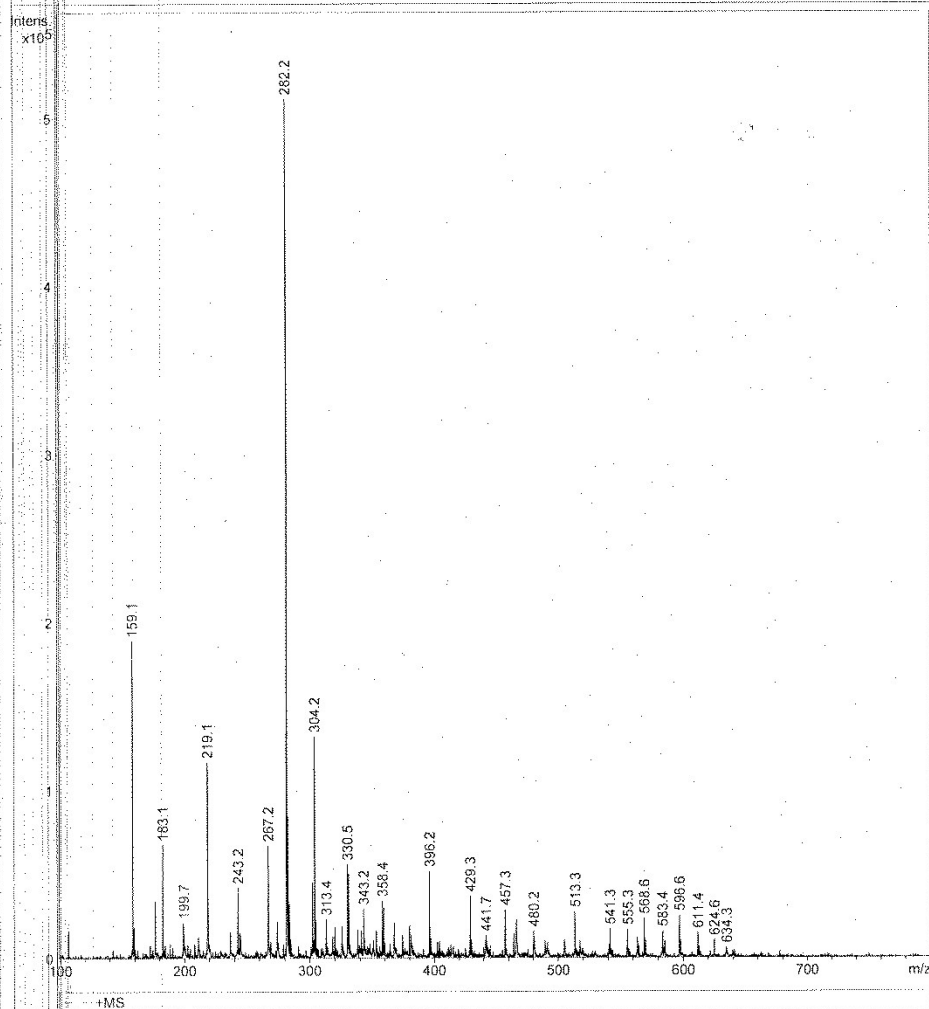

Bruker Daltonics DataAnalysis 3.4

printed: 3/27/2019 11:22:39

Page 1 of 1

Fig. S5 ESI-MS spectra of compound 4.



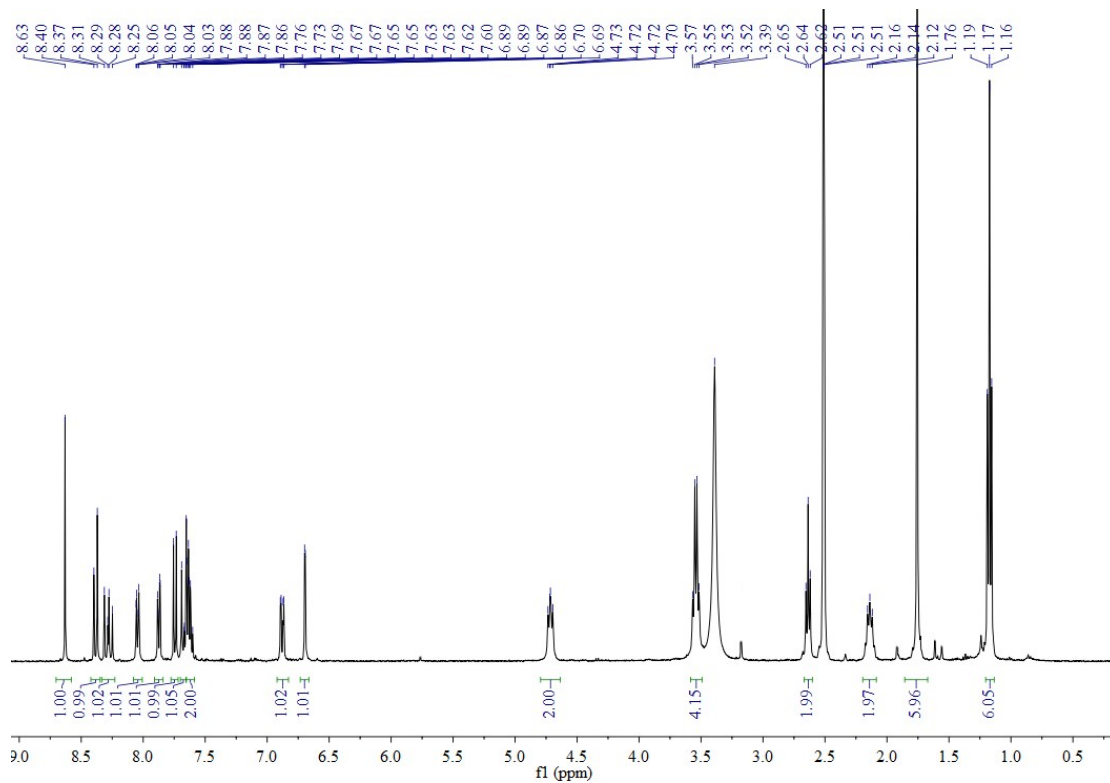

**Fig. S6**  $^1\text{H}$  NMR spectra of probe **1** in  $\text{DMSO-}d_6$ .

## Generic Display Report

|                      |                                                |                  |                       |
|----------------------|------------------------------------------------|------------------|-----------------------|
| <b>Analysis Info</b> |                                                | Acquisition Date | 5/22/2019 11:24:43 AM |
| Analysis Name        | D:\Data\Students_MS\New Folder\20190522-YY-2.d | Operator         | ESQ6K                 |
| Method               | STUDENTS_20190227.m                            | Instrument       | esquire6000           |
| Sample Name          | default                                        |                  |                       |
| Comment              |                                                |                  |                       |

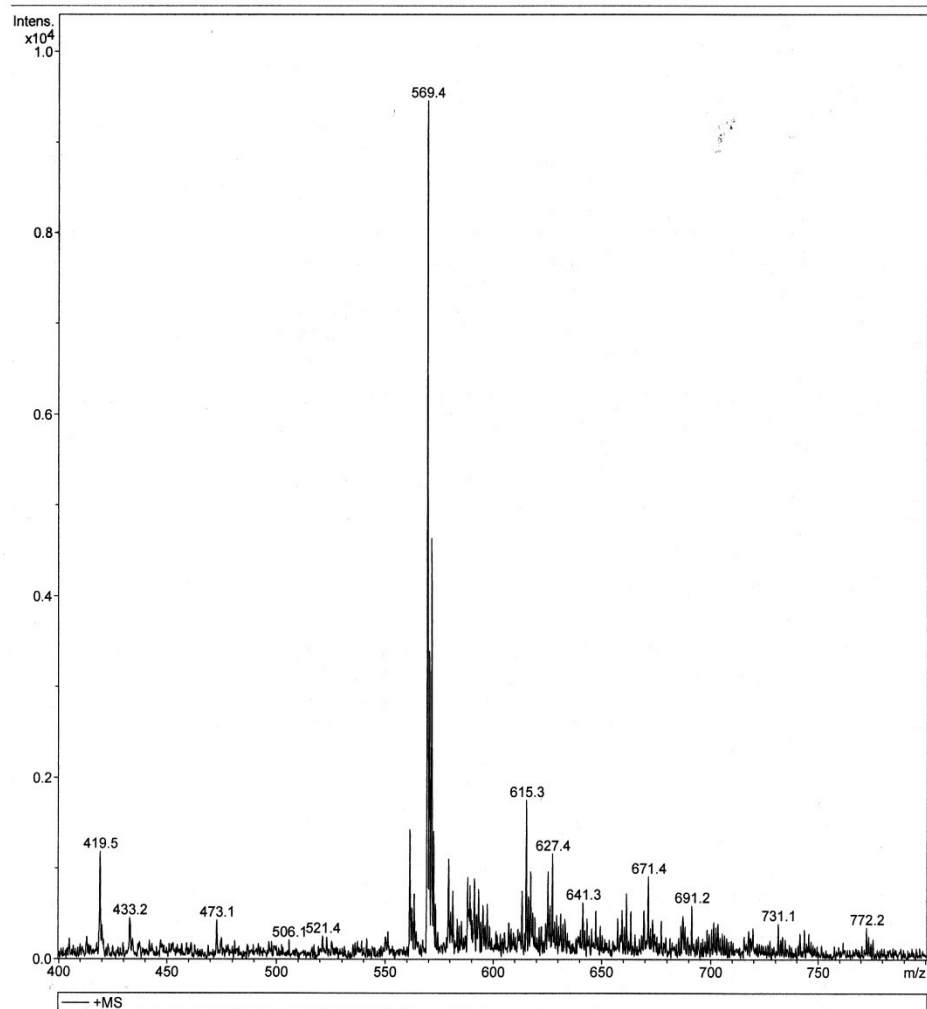

Bruker Daltonics DataAnalysis 3.4

printed: 5/22/2019 11:24:59 AM

Page 1 of 1

**Fig. S7** ESI-MS spectra of probe 1.

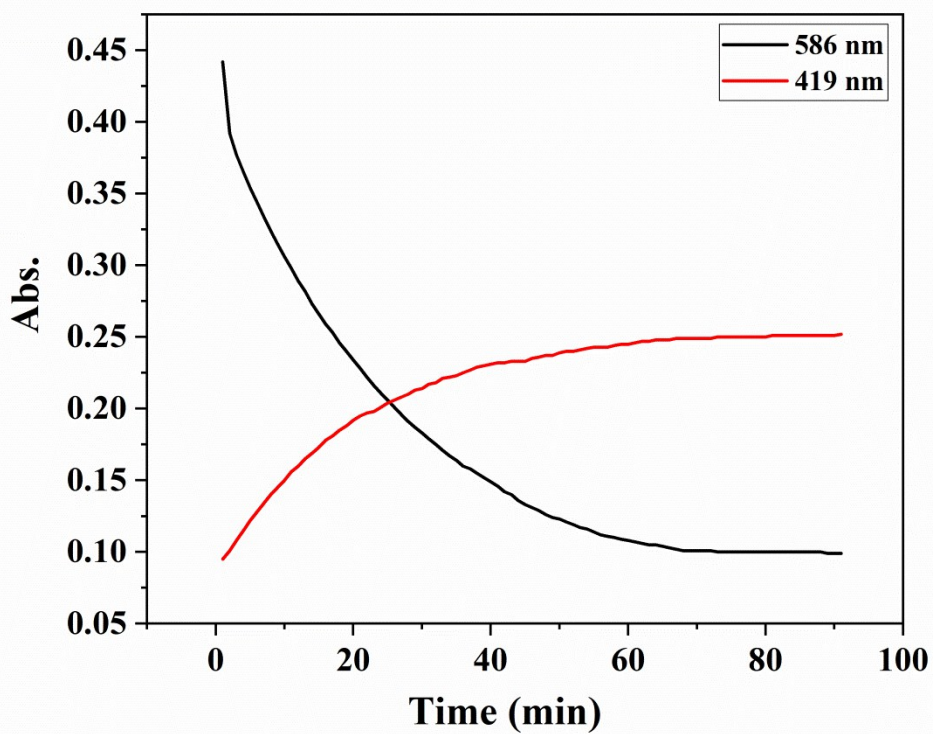

**Fig. S8** The absorption intensity of probe 1 (10  $\mu\text{M}$ ) as a function of time at 586 nm and 419 nm in the presence of Cys (250  $\mu\text{M}$ ).

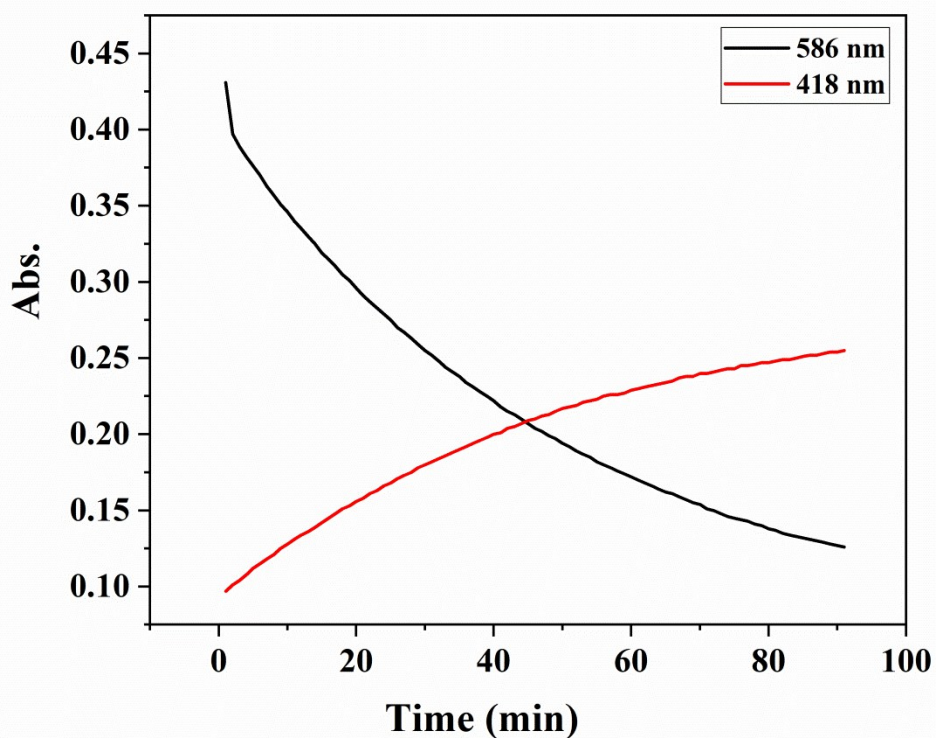

**Fig. S9** The absorption intensity of probe **1** ( $10\ \mu\text{M}$ ) as a function of time at 586 nm and 419 nm in the presence of Hcy ( $250\ \mu\text{M}$ ).

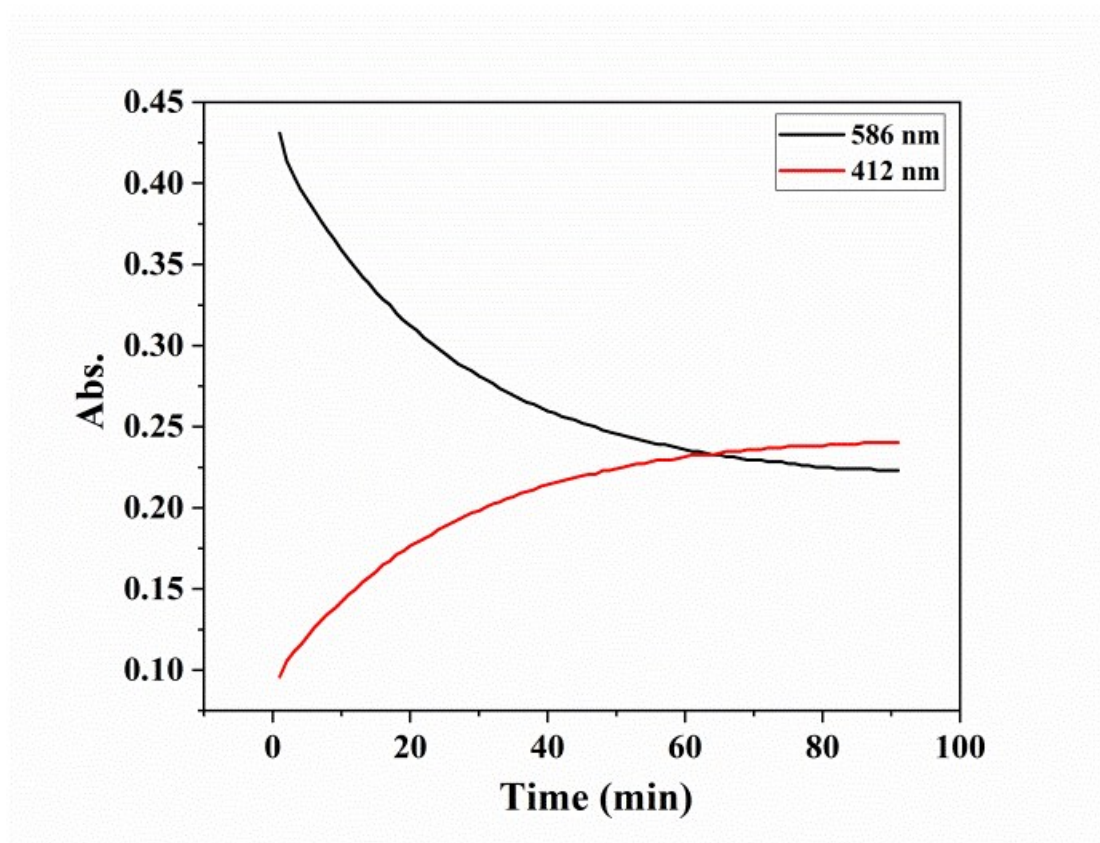

**Fig. S10** The absorption intensity of probe **1** ( $10\ \mu\text{M}$ ) as a function of time at 586 nm and 419 nm in the presence of GSH ( $250\ \mu\text{M}$ ).

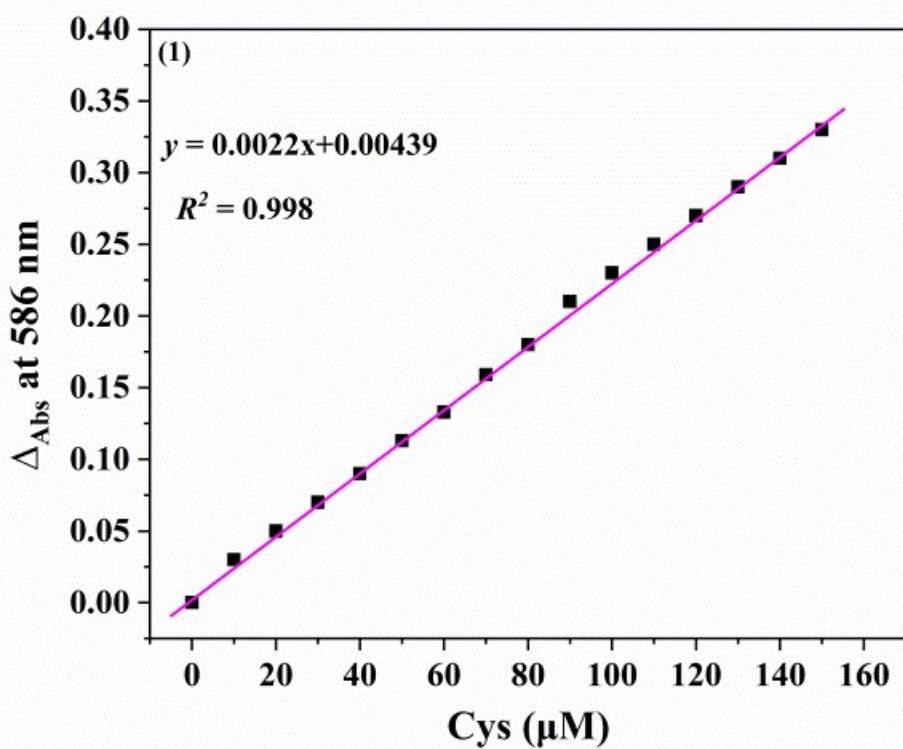

**Fig. S11** The absorption response of **1** at 586 nm and as a function of Cys concentration.

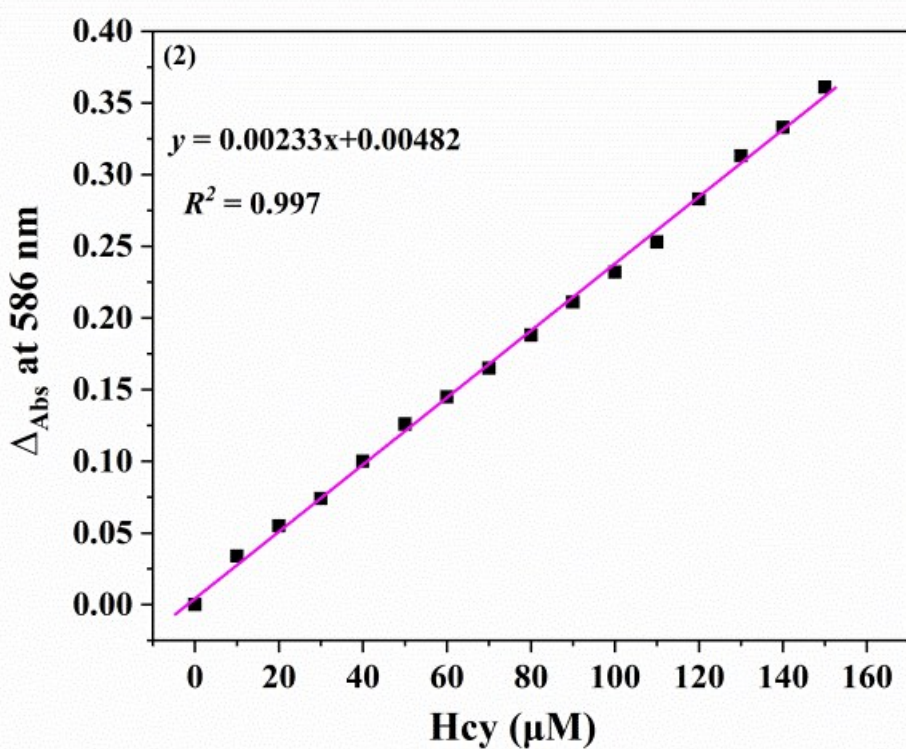

**Fig. S12** The absorption response of **1** at 586 nm and as a function of Hcy concentration.

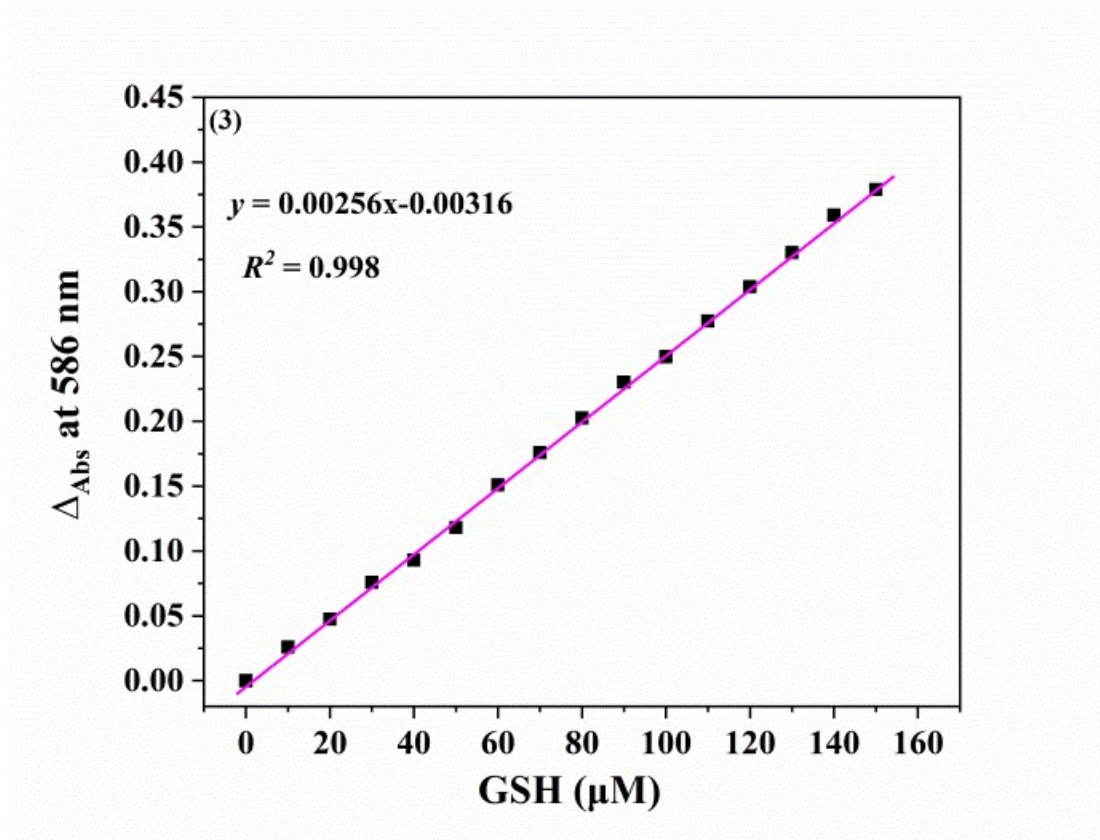

**Fig. S13** The absorption response of **1** at 586 nm and as a function of GSH concentration.

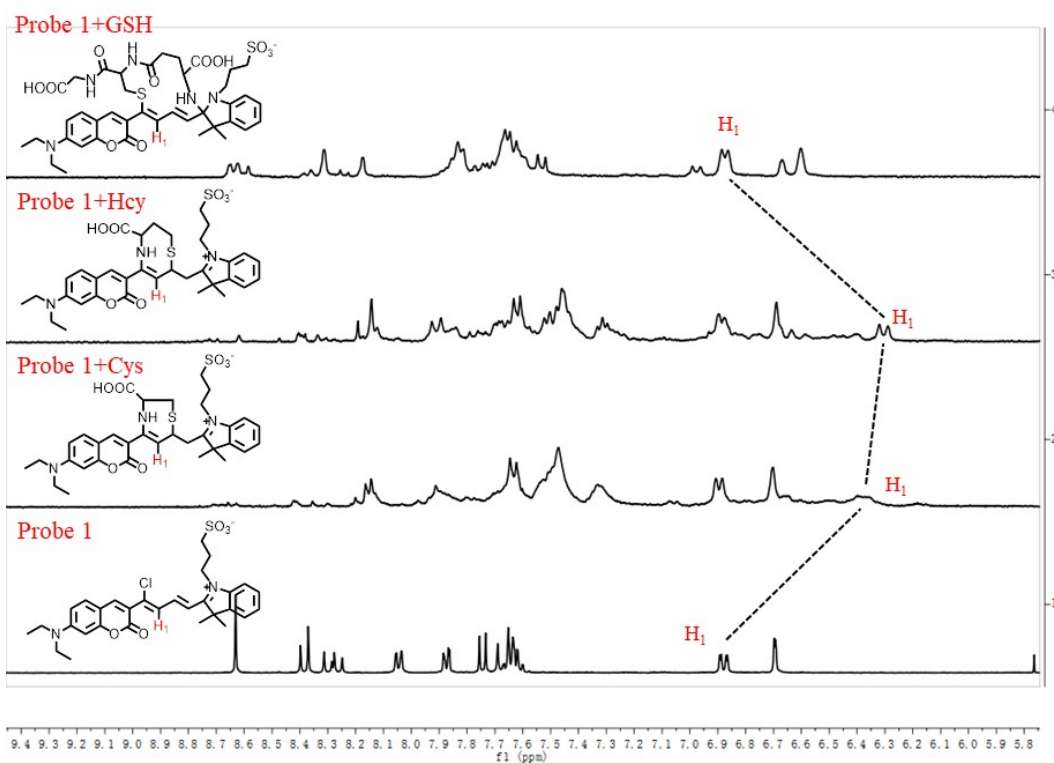

Fig. S14  $^1\text{H}$  NMR titration spectra of **1** in the presence of Cys, Hcy, and GSH.

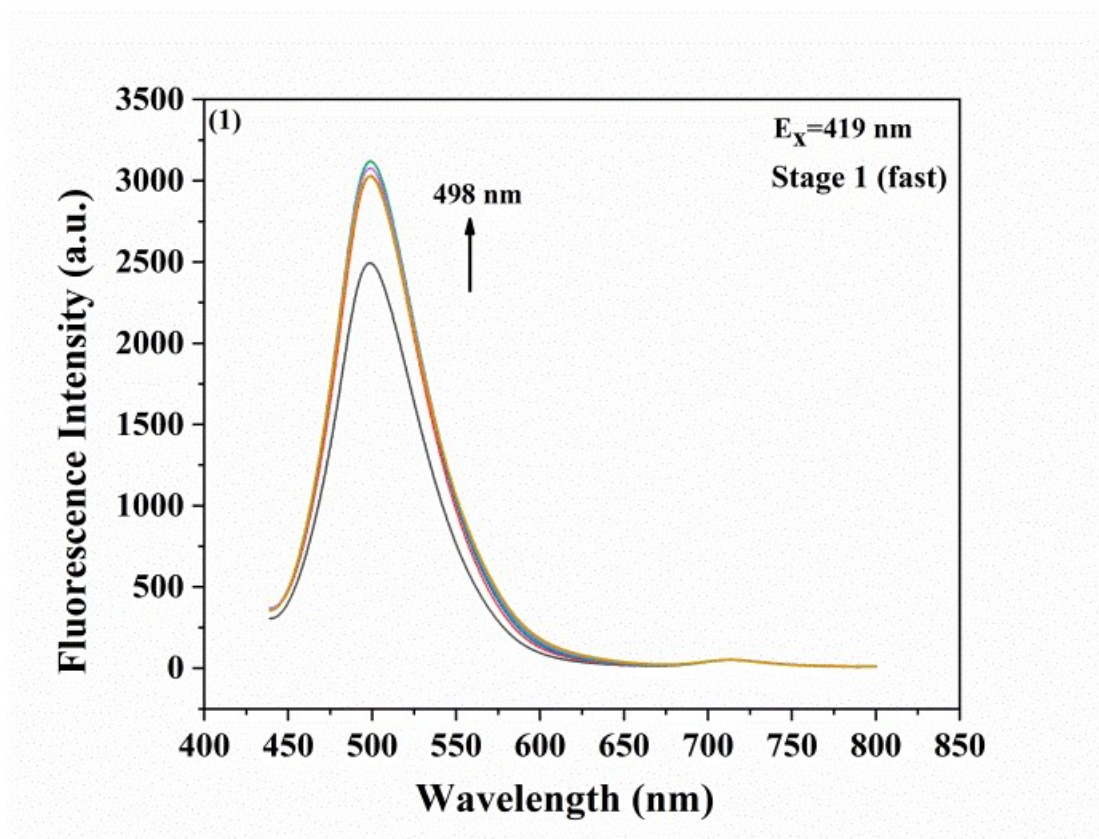

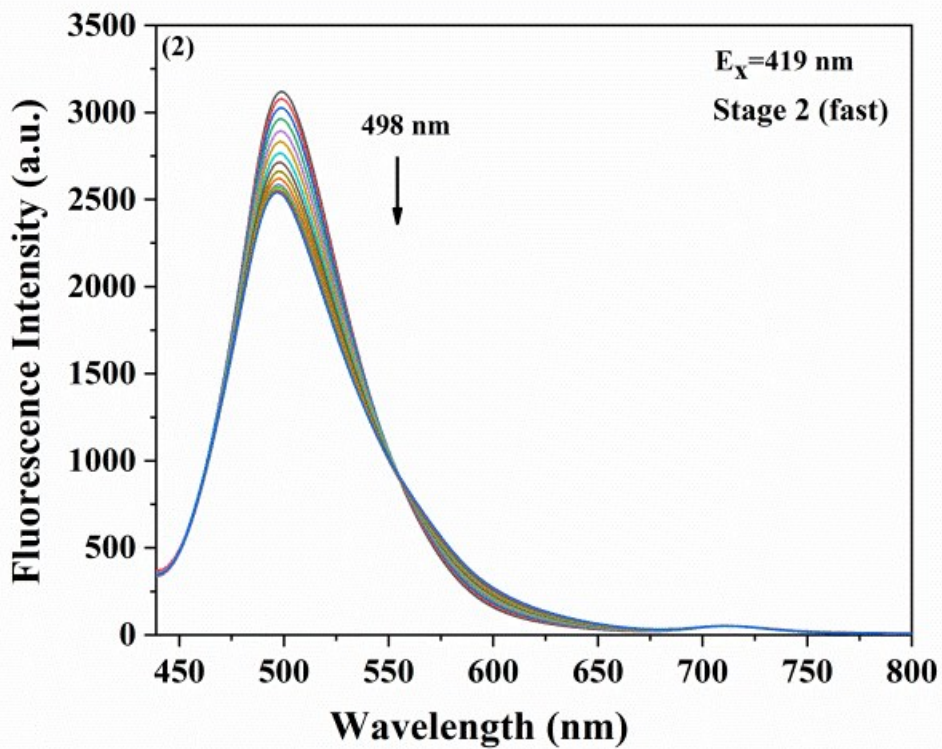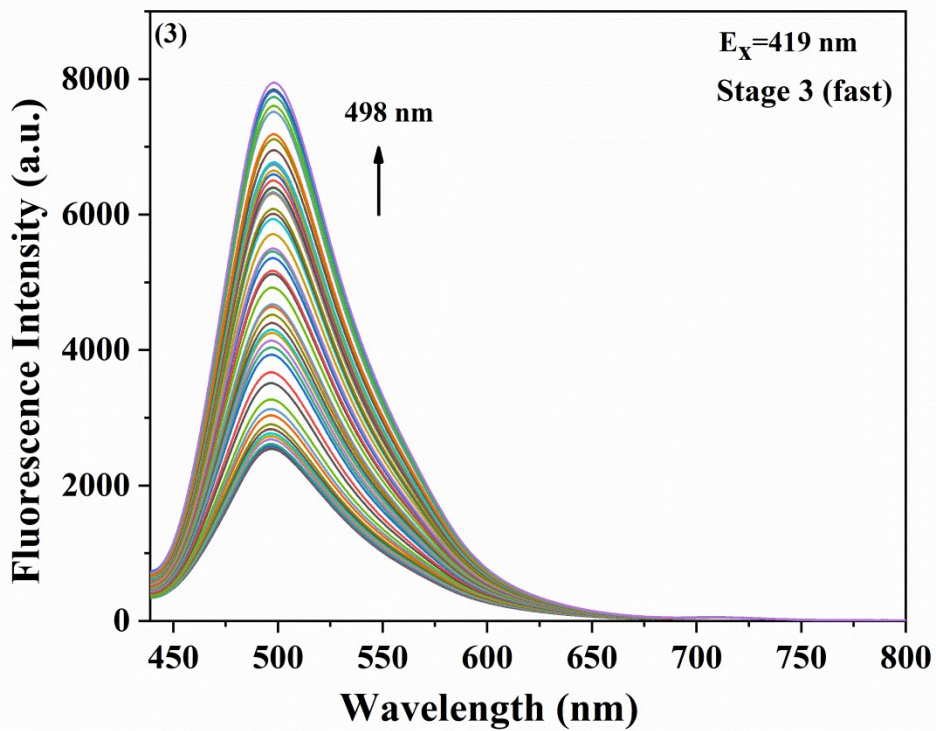

**Fig. S15** The time-dependent emission spectra of **1** (10  $\mu$ M) with 419 nm excitation upon addition of 250  $\mu$ M in phosphate-buffered saline (pH 7.4, 10 mM).



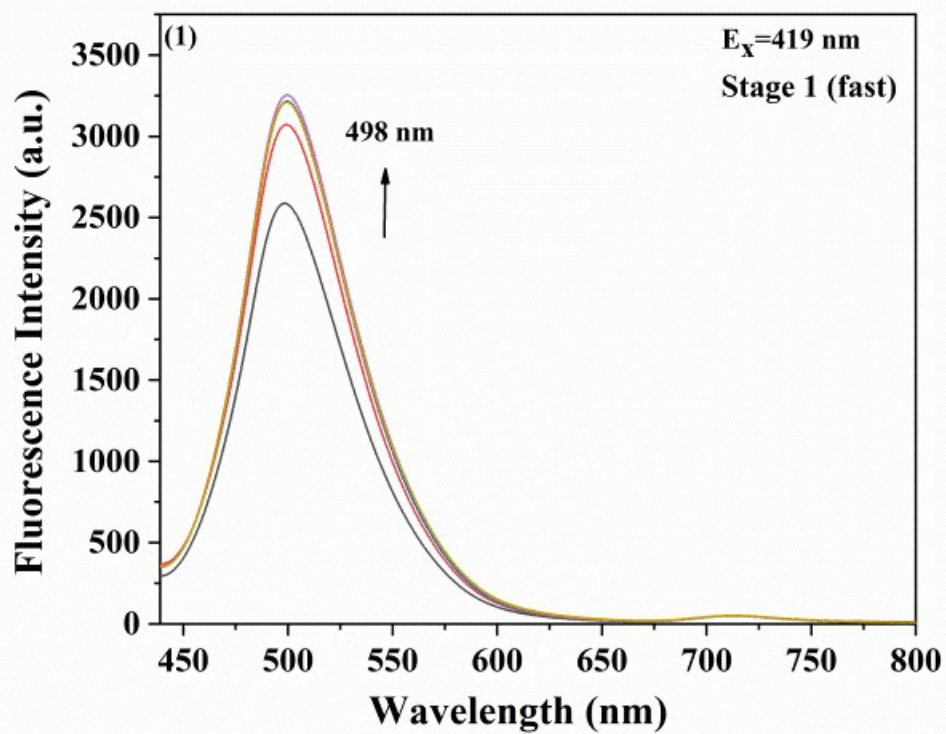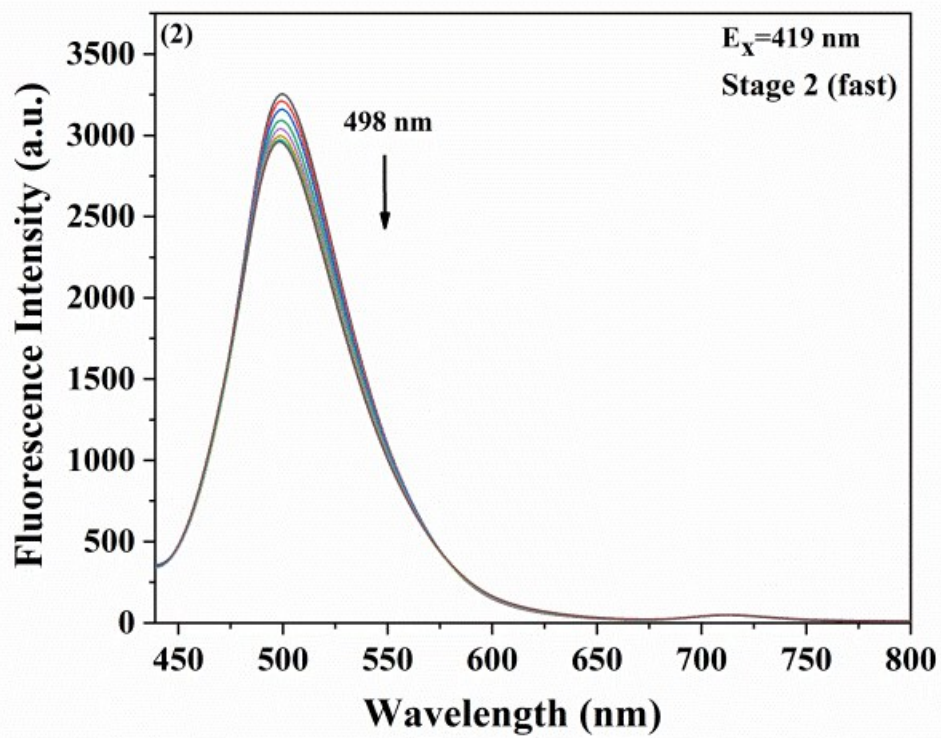

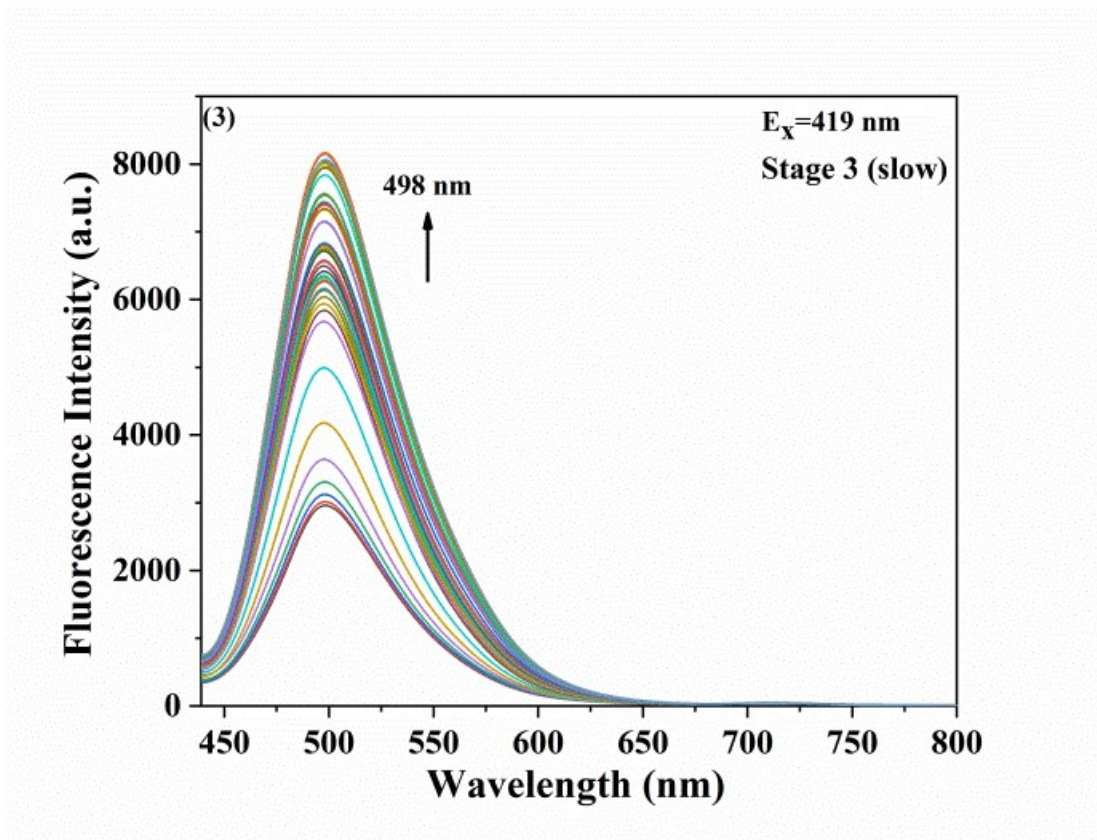

**Fig. S16** The time-dependent emission spectra of **1** (10 μM) with 419 nm excitation upon addition of 250 μM Hcy in phosphate-buffered saline (pH 7.4, 10 mM).

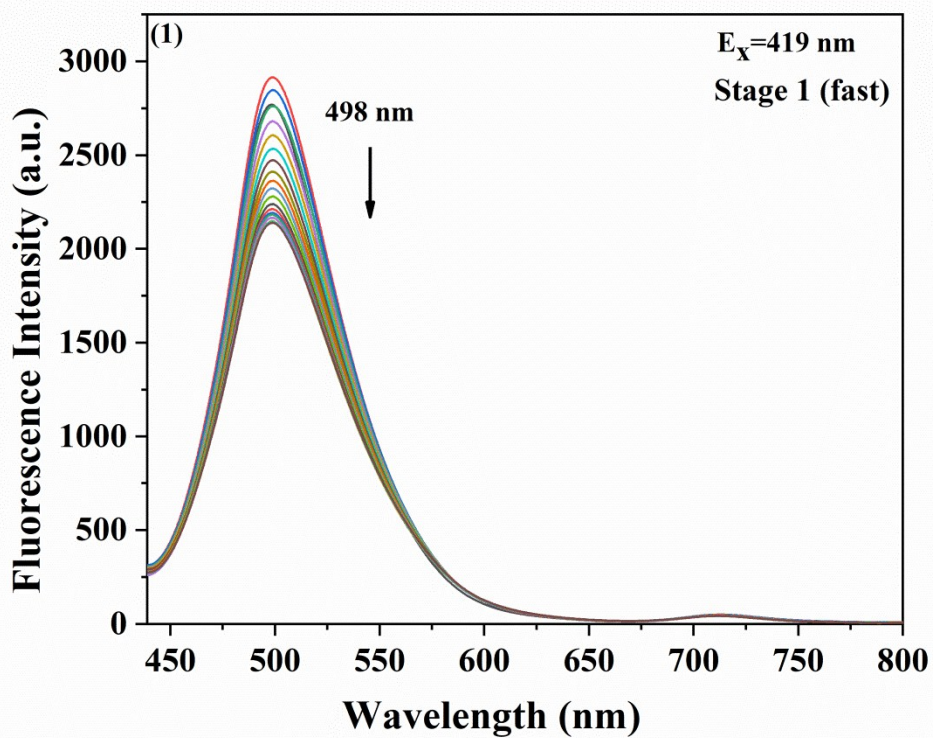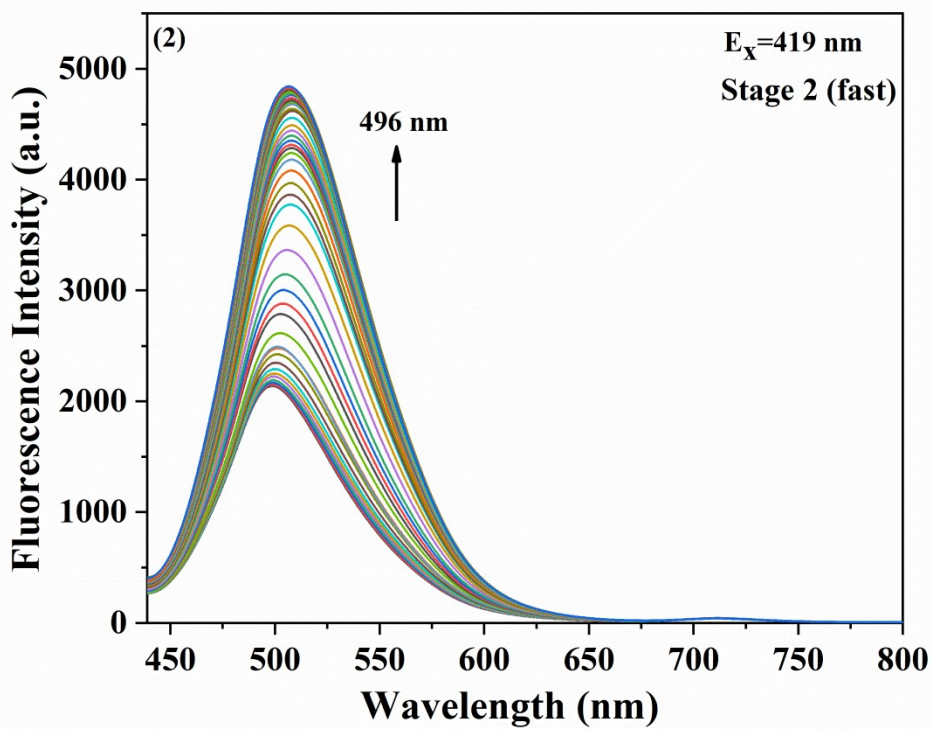

**Fig. S17** The time-dependent emission spectra of **1** ( $10\ \mu\text{M}$ ) with  $419\text{ nm}$  excitation upon addition of  $250\ \mu\text{M}$  GSH in phosphate-buffered saline ( $\text{pH } 7.4$ ,  $10\text{ mM}$ ).

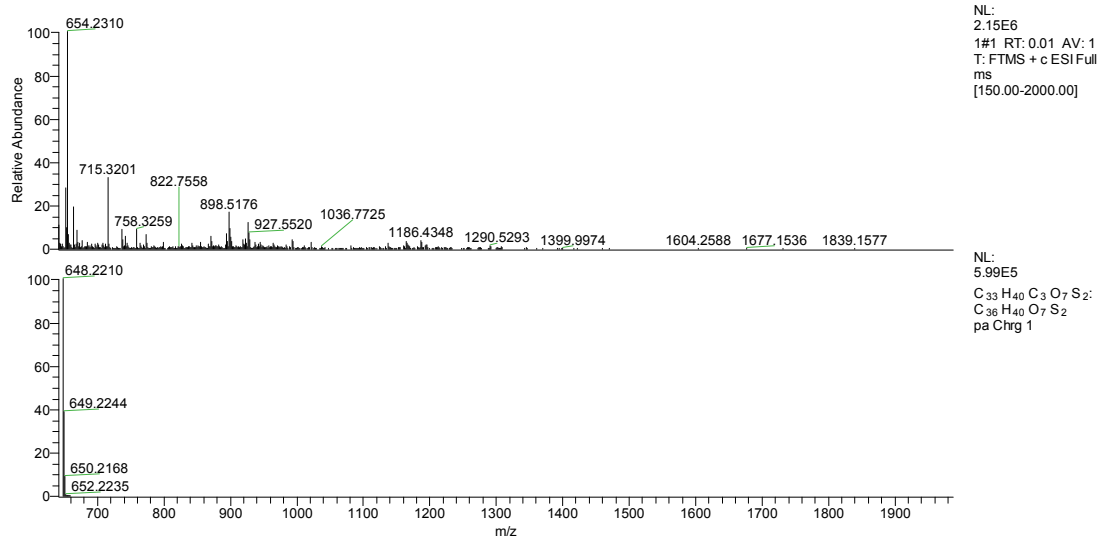

Fig. S18 The HRMS spectra of **1** with Cys.

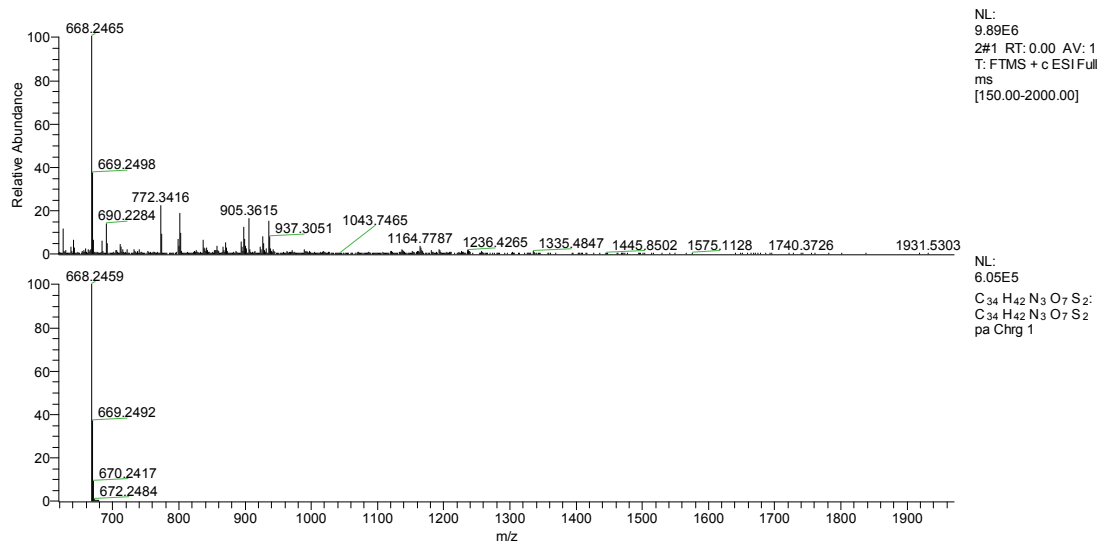

Fig. S19 The HRMS spectra of **1** with Hcy.

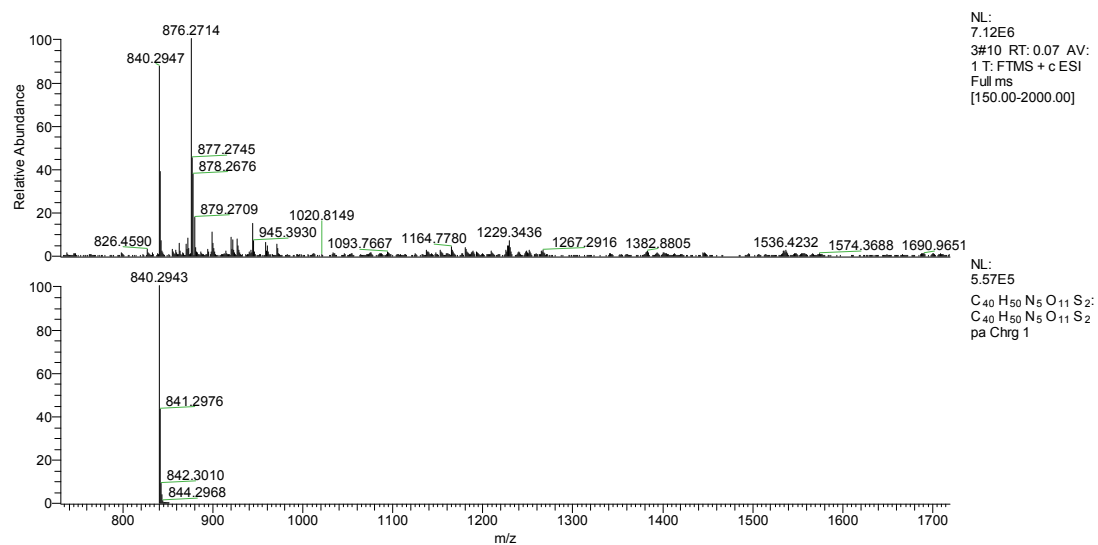

**Fig. S20** The HRMS spectra of **1** with GSH.

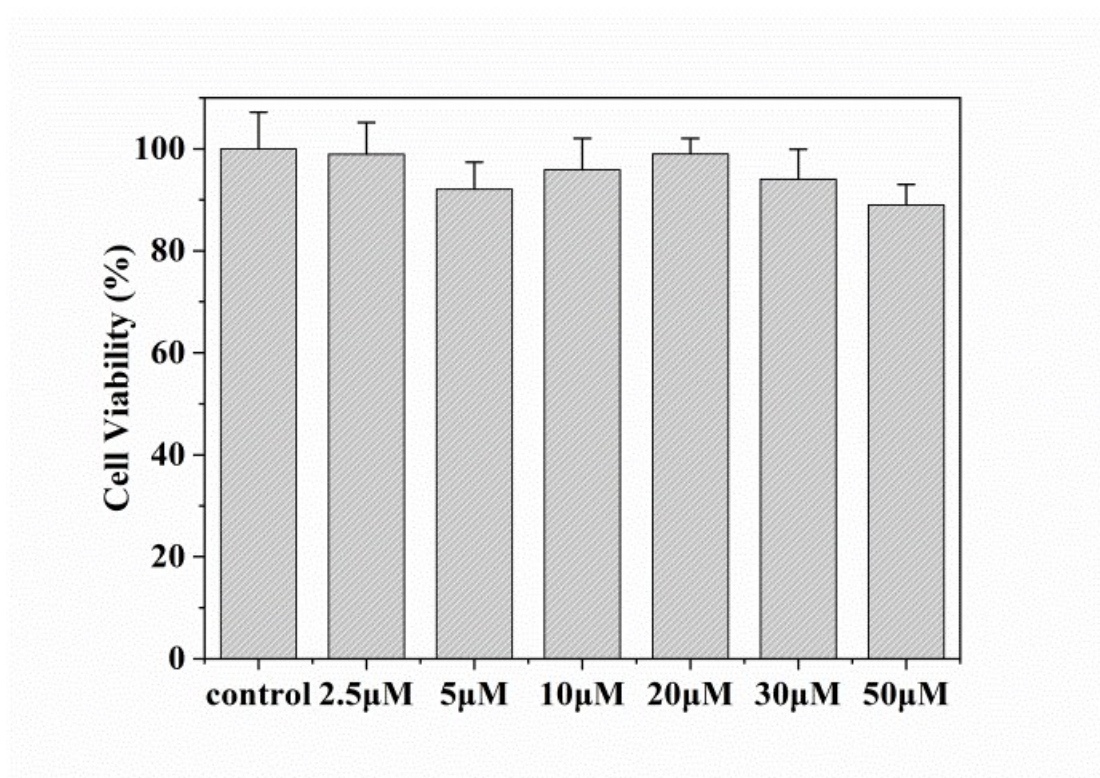

**Fig. S21** Cell viability values (%) estimated by MTT assay with HeLa cells, which were cultured in the presence of 0-50  $\mu\text{M}$  probe **1** for 24 h.
